# Supplementary material for: Efficacy and Safety of Immunotherapies in Refractory Myasthenia Gravis: A Systematic Review and Meta-Analysis
Source: Front Neurol. 2021 Dec 1;12:725700. doi: 10.3389/fneur.2021.725700 (PMC8672452; doi:10.3389/fneur.2021.725700)
Supplement: Supplementary file 4 [file Table_2.xlsx]

## Sheet: 全文
No	TITLE	Exclude reason	Note
1	Total body irradiation for myasthenia gravis: A long-term follow-up	Fail to report main outcomes or additional outcome
2	Thymectomy for myasthenia gravis	Failure to meet the critera of refractory generalized MG
3	Thymectomy for myasthenia gravis	Failure to meet the critera of refractory generalized MG	15th International Congress on Neuromuscular Diseases
4	Therapeutic and Immunoregulatory Effects of Tacrolimus in Patients with Refractory Generalized Myasthenia Gravis
5	Tacrolimus Improves Symptoms of Children With Myasthenia Gravis Refractory to Prednisone	Children patient was excluded
6	Suitable indications of eculizumab for patients with refractory generalized myasthenia gravis
7	Safety of an abbreviated transition period when switching from intravenous immunoglobulin to eculizumab in patients with treatment-refractory myasthenia gravis: A case series
8	Safety and efficacy of eculizumab in anti-acetylcholine receptor antibody-positive refractory generalised myasthenia gravis (REGAIN): a phase 3, randomised, double-blind, placebo-controlled, multicentre study
9	Safety and effectiveness of eculizumab for patients with generalized myasthenia gravis in Japan: Interim analysis of post-marketing surveillance	No detailed description of standard of refractory MG	6th Congress of the European Academy of Neurology
10	Rituximab in the treatment of refractory myasthenia gravis: Studying the outcomes using mmt score and need for plasmapheresis in Baghdad Teaching Hospital	No detailed discription of MMT score assessment used in this study
11	Rituximab in refractory myasthenia gravis: Extended prospective study results
12	Rituximab in refractory myasthenia gravis: a prospective, open-label study with long-term follow-up	An extended prospective study of it was included(Study.No.11)
13	Rituximab in refractory and non-refractory myasthenia: a retrospective multicenter study	No quantitative data for analysis of treatment effect was provided
14	Rituximab in myasthenia gravis: Early, late and impending crisis - Experience from A tertiary care centre	No detailed description of standard of refractory MG	5th Congress of the European Academy of Neurology, EAN 2019
15	Retrospective analysis of outcomes and safety after rituximab use for myasthenia gravis in patients ≥ 65 years old	Failure to meet the critera of refractory generalized MG	65th American Association of Neuromuscular and Electrodiagnostic Medicine Annual Meeting, AANEM 2018
16	Response to therapy in myasthenia gravis with anti-MuSK antibodies	Failure to meet the critera of refractory generalized MG
17	Response to eculizumab in patients with myasthenia gravis recently treated with chronic intravenous immunoglobulin	This study was a subgroup analysis of REGAIN	54th Annual Congress of the Canadian Neurological Sciences Federation, CNSF 2019
18	Response to eculizumab in patients with ACHR+ refractory myasthenia gravis recently treated with chronic IVIG	This study was a subgroup analysis of REGAIN	15th International Congress on Neuromuscular Diseases, ICNMD 2018
19	Response to eculizumab in myasthenia gravis patients recently treated with chronic IVIG	This study was a subgroup analysis of REGAIN	65th American Association of Neuromuscular and Electrodiagnostic Medicine Annual Meeting, AANEM 2018
20	Response of patients with refractory myasthenia gravis to rituximab: A retrospective study	No quantitative data for analysis of treatment effect was provided
21	Repeated low-dose rituximab treatment based on the assessment of circulating B cells in patients with refractory myasthenia gravis
22	Refractory myasthenia responsiveness to eculizumab in a tertiary care setting in challenging cases	No detailed description of standard of refractory MG	72nd Annual Meeting of the American Academy of Neurology, AAN 2020
23	Refractory myasthenia gravis - clinical profile, comorbidities and response to rituximab	No quantitative data for analysis of treatment effect was provided
24	Rebooting the immune system with high-dose cyclophosphamide for treatment of refractory myasthenia gravis	No quantitative data for analysis of treatment effect was provided
25	Post-intervention status in patients with refractory myasthenia gravis treated with eculizumab during REGAIN and its open-label extension
26	Plasmapheresis in the treatment of myasthenia gravis: retrospective study of 26 patients	Failure to meet the critera of refractory generalized MG
27	Plasmapheresis in refractory generalized myasthenia gravis	Failure to meet the critera of refractory generalized MG
28	Plasma exchange combined with cytotoxic drugs and lymphocytapheresis for myasthenia gravis	Failure to meet the critera of refractory generalized MG
29	P.376Effect of low-dose rituximab treatment on T- and B-cell lymphocyte imbalance in refractory myasthenia gravis	No detailed description of standard of refractory MG	24the International Congress of the World Muscle Society
30	Open label extension trial of regain to evaluate the safety and efficacy of eculizumab in patients from Japan with refractory generalized myasthenia gravis	It was a subgroup analysis of study 8, 25 and 72	23rd World Congress of Neurology, WCN 2017
31	No change in risk of infection among NMOSD and refractory gMG patients treated with eculizumab: Findings from two phase 3 studies and their extensions	It was a subgroup analysis of study 8, 25 and 72	6th Congress of the European Academy of Neurology
32	Mycophenolate mofetil for myasthenia gravis: An open-label pilot study	The number of enrolled refractory gMG patients was only 7
33	'minimal symptom expression' with eculizumab in myasthenia gravis	It was a interim analysis of study 25 and 72	65th American Association of Neuromuscular and Electrodiagnostic Medicine Annual Meeting, AANEM 2018
34	'Minimal symptom expression' in acetylcholine receptorpositive refractory myasthenia gravis patients treated with eculizumab	It was a interim analysis of study 25 and 73	15th International Congress on Neuromuscular Diseases, ICNMD 2018
35	Minimal manifestations with eculizumab in myasthenia gravis	It was a interim analysis of study 25 and 74	65th American Association of Neuromuscular and Electrodiagnostic Medicine Annual Meeting, AANEM 2018
36	Low-dose rituximab lowers serum Exosomal miR-150-5p in AChR-positive refractory myasthenia gravis patients	Recruited patients of this study was partially overlapped with study 52 according to the author
37	Low-dose rituximab every 6 months for the treatment of acetylcholine receptor–positive refractory generalized myasthenia gravis	Recruited patients of this study was partially overlapped with study 52 according to the author
38	Long-term safety and efficacy of eculizumab in generalized myasthenia gravis	It was a interim analysis of study 25 and 72
39	Long-term efficacy of eculizumab on the MG-ADL scale, and its respiratory, bulbar, limb and ocular domains in patients with acetylcholine receptor-positive refractory generalized myasthenia gravis	It was a interim analysis of study 25 and 72	29th Annual Meeting of the Japanese Society for Neuroimmunology, JSNI 2017
40	Long-term prednisone followed by thymectomy in myasthenia gravis	Failure to meet the critera of refractory generalized MG
41	Immunoglobulin treatment in refractory myasthenia gravis	Failure to meet the critera of refractory generalized MG
42	High-dose intravenous methylprednisolone in myasthenia gravis	Failure to meet the critera of refractory generalized MG
43	High efficacy of rituximab for myasthenia gravis: a comprehensive nationwide study in Austria
44	High dose cyclophosphamide (HD CY) without hematopoietic stem cell transplantation (HSCT) in refractory severe autoimmune diseases: 11 Year experience in over 100 patients	No detailed description of recruited standard of MG	51st Annual Meeting of the American Society of Hematology, ASH
45	Frequency and clinical features of treatment-refractory myasthenia gravis	No detailed discription of treatment effect
46	Efficacy of repeated doses of intravenous immunoglobulin in patients with refractory myasthenia gravis	No detailed description of standard of refractory MG	19th Meeting of the European Neurological Society
47	Efficacy of eculizumab on myasthenia gravis-activities of daily living and its respiratory, bulbar, limb and ocular domains in patients with ACHR+ refractory generalized myasthenia gravis	It was a interim analysis of study 25 and 72	64th Annual Meeting of the American Association of Neuromuscular and Electrodiagnostic Medicine , AANEM 2017
48	Efficacy of eculizumab is maintained beyond 26 weeks in patients with acetylcholine receptor-positive refractory generalized myasthenia gravis	It was a interim analysis of study 25 and 72	64th Annual Meeting of the American Association of Neuromuscular and Electrodiagnostic Medicine , AANEM 2017
49	Efficacy and safety of Rituximab in myasthenia gravis: A multicentric real life study	It was overlapped with study 50	6th Congress of the European Academy of Neurology
50	Efficacy and safety of rituximab in myasthenia gravis: a French multicentre real-life study	Failure to meet the critera of refractory generalized MG
51	Efficacy and safety of eculizumab in patients with anti-acetylcholine receptor antibody positive generalized refractory myasthenia gravis previously treated with rituximab	It was a interim analysis of study 25 and 72	5th Congress of the European Academy of Neurology, EAN 2019
52	Effect of low-dose rituximab treatment on T- and B-cell lymphocyte imbalance in refractory myasthenia gravis
53	Efficacy of Rituximab in Refractory Generalized anti-AChR Myasthenia Gravis
54	Eculizumab shows consistent improvements across muscle groups in patients with AChR antibody-positive refractory myasthenia gravis	It was a interim analysis of study 8	54th Annual Congress of the Canadian Neurological Sciences Federation, CNSF 2019
55	Eculizumab shows consistent improvement across quantitative myasthenia gravis test muscle groups	It was a interim analysis of study 8	65th American Association of Neuromuscular and Electrodiagnostic Medicine Annual Meeting, AANEM 2018
56	Eculizumab shows consistency of improvement across muscle groups in patients with achr-positive refractory myasthenia gravis	It was a interim analysis of study 8	15th International Congress on Neuromuscular Diseases, ICNMD 2018
57	Eculizumab reduces myasthenia gravis exacerbation rates	It was a interim analysis of study 25 and 72	65th American Association of Neuromuscular and Electrodiagnostic Medicine Annual Meeting, AANEM 2018
58	Eculizumab reduces exacerbation rates in patients with ACHR+ refractory generalized myasthenia gravis	It was a interim analysis of study 25 and 72	15th International Congress on Neuromuscular Diseases, ICNMD 2018
59	Eculizumab improves fatigue in patients with refractory generalized myasthenia gravis in the REGAIN study	Fail to report main outcomes or additional outcome	3rd Congress of the European Academy of Neurology
60	Durability of the rituximab response in acetylcholine receptor autoantibody-positivemyasthenia gravis
61	Dual responder analyses of both muscle strength and activities of daily living, eculizumab versus placebo, in refractory generalized myasthenia gravis (gMG) Patients: Results from the REGAIN Study	It was a interim analysis of study 8	69th American Academy of Neurology Annual Meeting, AAN 2017
62	Disease exacerbation after rituximab induction in neuromyelitis optica and myasthenia gravis	No detailed description of recruited standard of MG	68th American Academy of Neurology Annual Meeting, AAN 2016
63	Differential response to rituximab in anti-AChR and anti-MuSK positive myasthenia gravis patients: a single-center retrospective study
64	Comparison between rituximab treatment for new-onset generalized myasthenia gravis and refractory generalized myasthenia gravis
65	Comparative evaluation of modified-dose of rituximab and other initial treatment choices for Myasthenia Gravis	Failure to meet the critera of refractory generalized MG	17th International Congress of Immunology
66	Clinical correlates with anti-MuSK antibodies in generalized seronegative myasthenia gravis	Failure to meet the critera of refractory generalized MG
67	Cladribine in myasthenia gravis: a pilot open-label study
68	Achievement of minimal manifestations in eculizumab-treated achrpositive refractory myasthenia gravis patients	It was a interim analysis of study 25 and 72	15th International Congress on Neuromuscular Diseases, ICNMD 2018
69	A study on treatment pattern for refractory myasthenia gravis and myasthenia gravis in crisis in a super speciality hospital with particular reference to rituximab	No detailed description of recruited standard of MG	22nd Annual Conference of the Indian Academy of Neurology, IANCON 2014
70	A randomized, double-blind, placebo-controlled phase II study of eculizumab in patients with refractory generalized myasthenia gravis
71	‘Minimal symptom expression’ in patients with acetylcholine receptor antibody-positive refractory generalized myasthenia gravis treated with eculizumab
72	Treatment of myasthenia gravis with high-dose intravenous immunoglobulin	Only 8 patients meet the critera of refractory generalized MG
73	Clinical Experience with Eculizumab in Treatment-Refractory Acetylcholine Receptor Antibody-Positive Generalized Myasthenia Gravis
74	Long-term efficacy of eculizumab in refractory generalized yasthenia gravis: Responder analyses	It was overlapped with study 25 and 72	Annual Meeting of the American Association of Neuromusculer and Medicine, AANEM 2019
